# Supplementary material
Source: PubMed Central journal article supplement (PMC3409430)
Supplement: mmc1.pdf [file mmc1.pdf]

|           |     |                                                             |            |            |  |
|-----------|-----|-------------------------------------------------------------|------------|------------|--|
|           |     |                                                             | Primer 203 |            |  |
| EAR1 cDNA | 1   | ATGGGTCCGAGCTGCTTGAGTCCCAGCTTTGTCTCCTGCTGCTGCTAGGACTTGCCTA  |            | 60         |  |
| EAR2 cDNA | 1   | ATGGGTCCGAGCTGCTTGAGTCTCGACTTTGTCTCCTGCTGCTGCTAGGACTTGCCTA  |            | 60         |  |
| EAR3 cDNA | 1   | ATGGGTCCGAGCTGCTTGAGTCCCAGCTTTGTCTCCTGCTGCTGCTAGGACTTGCCTA  |            | 60         |  |
|           |     | *****                                                       |            |            |  |
| EAR1 cDNA | 61  | ATGCTTGCCTCATGCCTGGGTCAAAACCCCTTCCCAGAGTTTGCATCCAGCATATCAAT |            | 120        |  |
| EAR2 cDNA | 61  | ATGCTTGCCTCATGCCTGGGACAACCCCTTCCCAGTGGTTGCCATCCAGCATATCAAT  |            | 120        |  |
| EAR3 cDNA | 61  | ATGCTTGCCTCATGCCTGGGACAACCCCTTCCCAGTGGTTGCCATCCAGCATATCAAT  |            | 120        |  |
|           |     | ***** * *****                                               |            |            |  |
| EAR1 cDNA | 121 | ATAATACCAACCTCCATGTARTGTTGAARTGATGCGTATTACAGGGCTAGAGAGACA   |            | 180        |  |
| EAR2 cDNA | 121 | ATAATGCCAACCTCCATGTARTGTTGAARTGCAGCGTATTACAGGTTTAGAGAGACA   |            | 180        |  |
| EAR3 cDNA | 121 | ATAATACCAACCTCCATGTARTGTTGAARTGCTGCGTATTACAGGTTTAGAGAGACA   |            | 180        |  |
|           |     | ***** *****                                                 |            |            |  |
|           |     |                                                             | Primer 238 |            |  |
| EAR1 cDNA | 181 | TGTAGGGCTTAATACTTTTCTTCATACAAGTTTGTCTAATGCTGTTGGTGTGTGTGGA  |            | 240        |  |
| EAR2 cDNA | 181 | TGTAGGGCTTAATACTTTTCTTCATACAAGTTTGTCTAATGCTGTTGGTGTGTGTGGA  |            | 240        |  |
| EAR3 cDNA | 181 | TGTAGGGCTTAATACTTTTCTTCATACAAGTTTGTCTAATGCTGTTGGTGTGTGTGGA  |            | 240        |  |
|           |     | *****                                                       |            |            |  |
| EAR1 cDNA | 241 | ATCCAAGTGGCTTGTGCAGTGACAGAGAGTCAAACTGTCATAATAGTTCATCTCGG    |            | 300        |  |
| EAR2 cDNA | 241 | ATCCAAGTGGCTTGTGCAGTGACAAATATAAGTAGAACTGTCATAATAGTTCATCTCGG |            | 300        |  |
| EAR3 cDNA | 241 | ATCCAAGTGGCTTGTGCAGTGACAAATATAAGTAGAACTGTCATAATAGTTCATCTCGG |            | 300        |  |
|           |     | ***** * **** *****                                          |            |            |  |
| EAR1 cDNA | 301 | GTACATATACTGTCTGTACATCACCAGTCGGGC---AACAAATTATACCAATGCAGA   |            | 357        |  |
| EAR2 cDNA | 301 | GTACGTATACTGTCTGTACATCACCAGTCGGAGGAGAACACCTTATACCAATGCAGA   |            | 360        |  |
| EAR3 cDNA | 301 | GTACATATACTGTCTGTACATCACCAGTCGGAGGAGAAACCTTATACCAATGCAGA    |            | 360        |  |
|           |     | *** ***** ** * *****                                        |            |            |  |
| EAR1 cDNA | 358 | TACCAATCAGAGAGATCATTGGAGTACTACACAGTTGCCTGTGACCCAGAACTCCACAG |            | 417        |  |
| EAR2 cDNA | 361 | TACCAATCAGAGAGATCATTGGAGTACTACACAGTTGCCTGTGACCCAGAACTCCACAG |            | 420        |  |
| EAR3 cDNA | 361 | TACCAATCAGAGAGATCATTGGAGTACTACACAGTTGCCTGTGACCCAGAACTCCACTG |            | 420        |  |
|           |     | ***** ***** * ***** ** *                                    |            |            |  |
|           |     |                                                             | Primer 239 | Primer 204 |  |
| EAR1 cDNA | 418 | GACAGTCCCATGTATCCAGTGGTCCAGTTCACCTTGGATGGGACATTTTAG         |            | 468        |  |
| EAR2 cDNA | 421 | GACAGTCCCATGTATCCAGTGGTCCAGTTCACCTTGGATGGGACATTTTAG         |            | 471        |  |
| EAR3 cDNA | 421 | GACAGTCCCATGTATCCAGTGGTCCAGTTCACCTTGGATGGGACATTTTAG         |            | 471        |  |
|           |     | *****                                                       |            |            |  |

Figure 1S
