# Supplementary material
Source: PubMed Central journal article supplement (PMC3409430)

**A**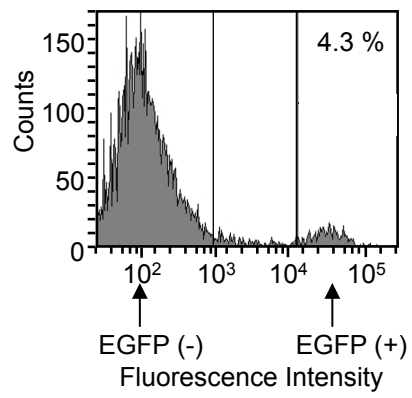**B**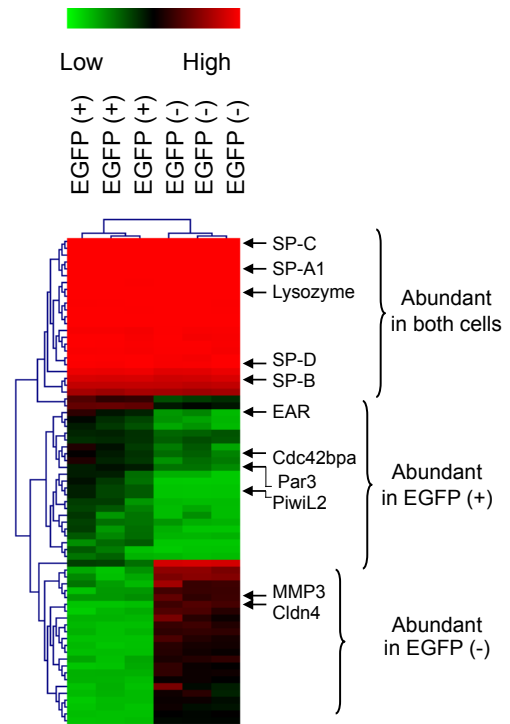

Figure 2S

Supplement: mmc2.pdf [file mmc2.pdf]

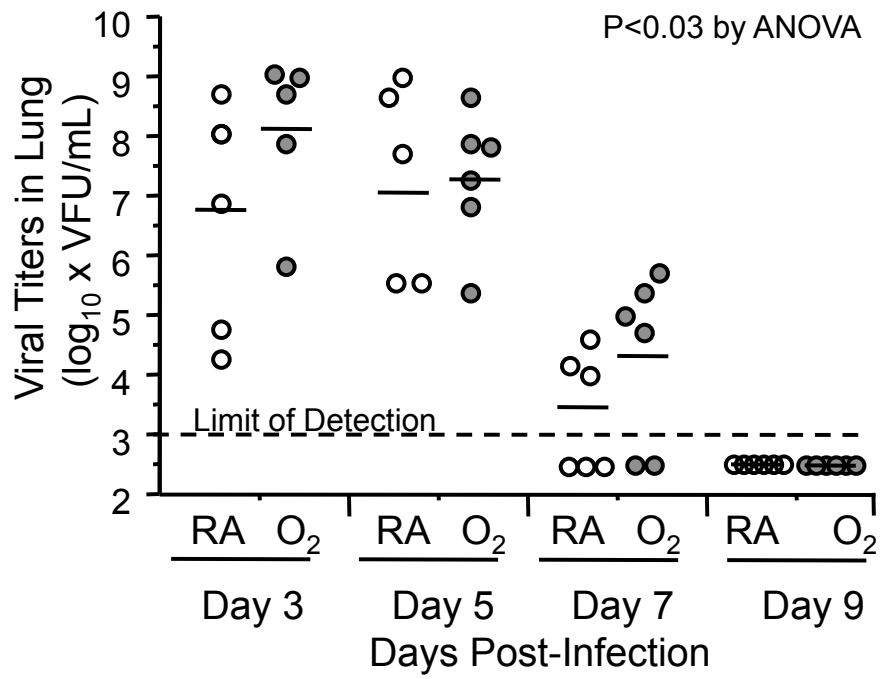

Figure 3S

Supplement: mmc3.pdf [file mmc3.pdf]

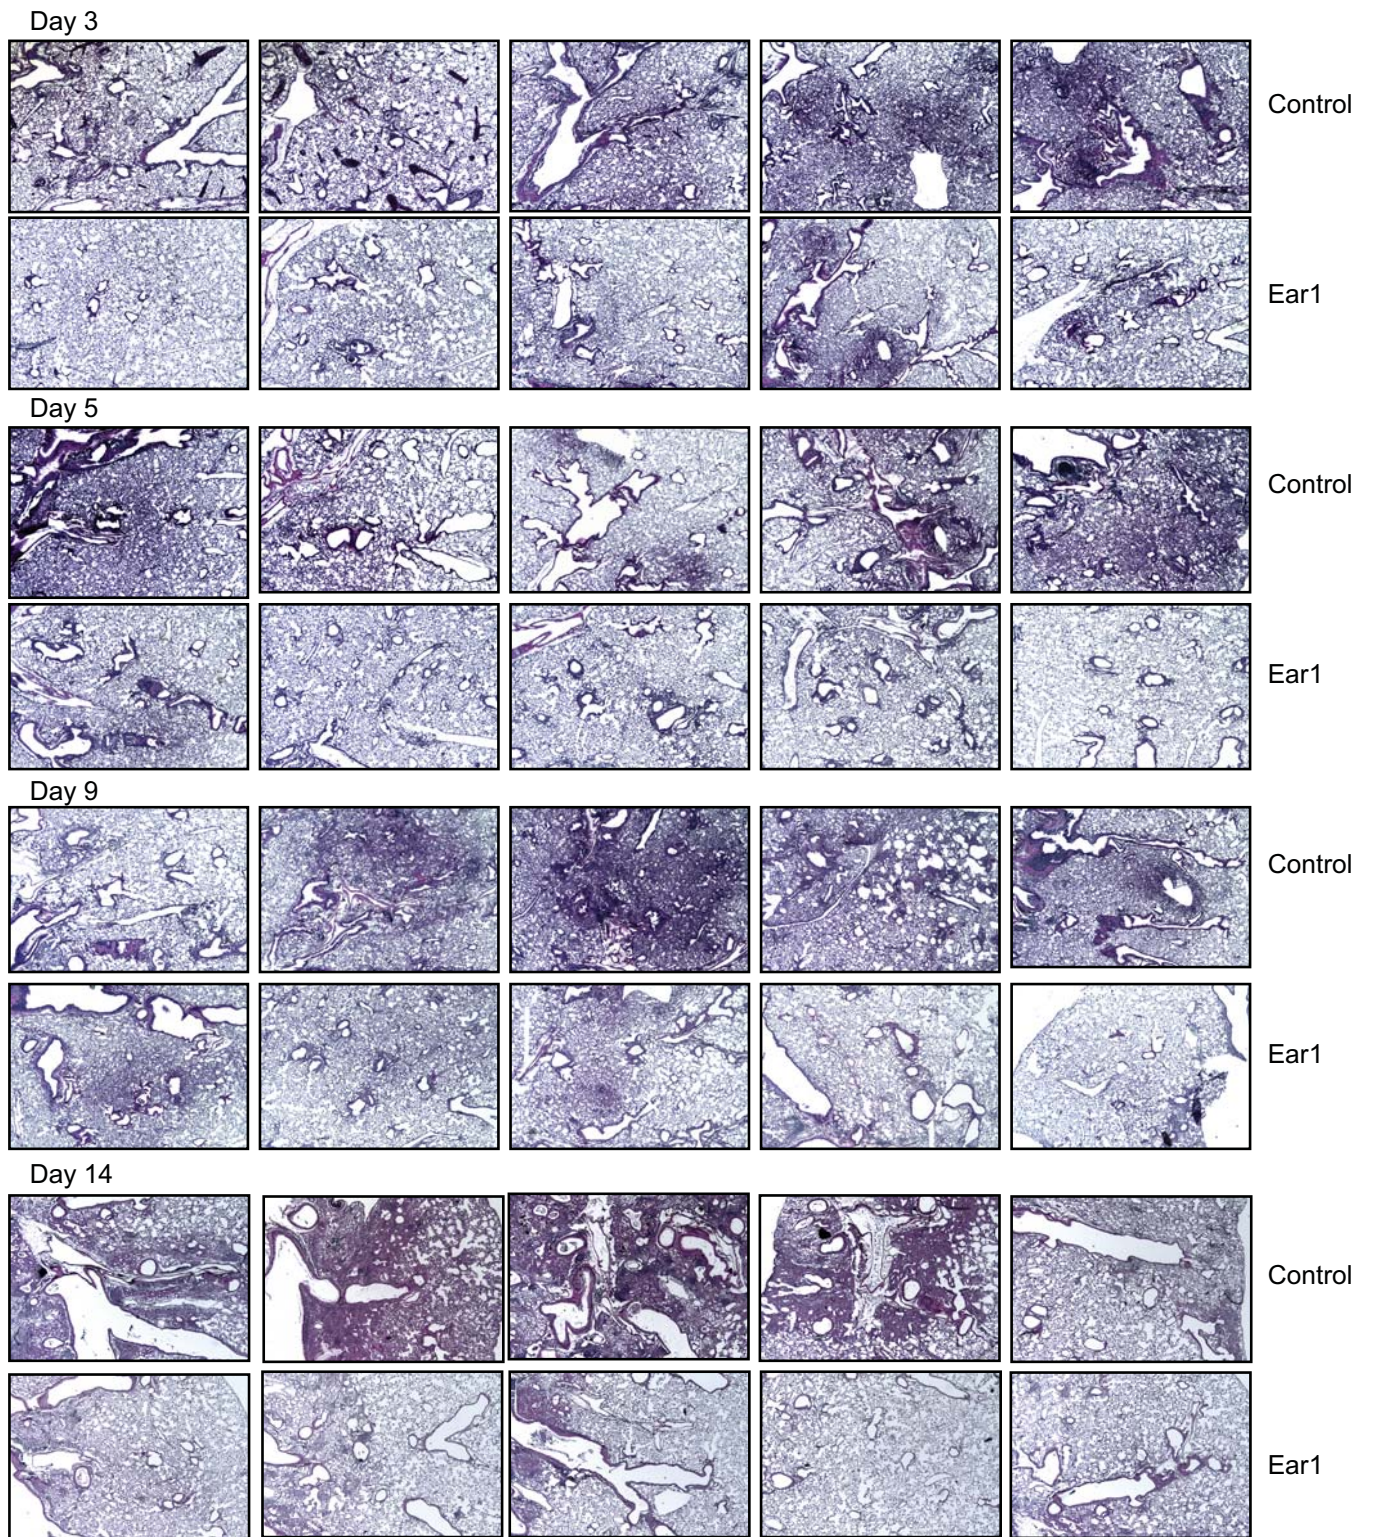

Figure 4S

Supplement: mmc4.pdf [file mmc4.pdf]
